# Supplementary material
Source: Research Square preprint supplement (doi:10.21203/rs.3.rs-9858931/v1)
Supplement: Supplementary file 1 [file 7147f7522aadd556caf1d96c.docx]

**Histological sections of Middle Histological sections of Posterior**

**Silk gland of V Instar at different light Silk gland of V Instar at different light**

**Intensity intensity**

**
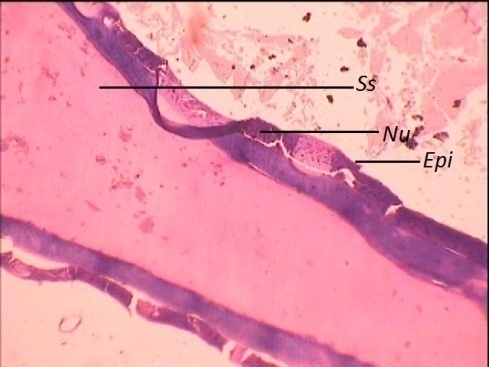

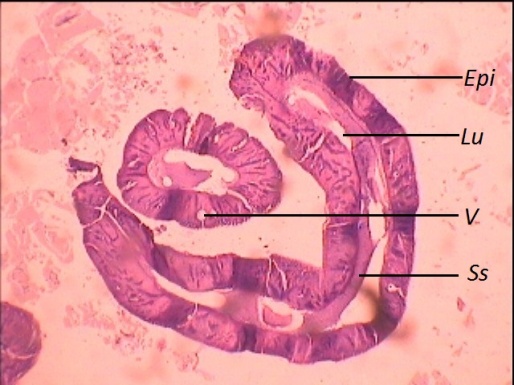
**

**Plate 1. Middle silk gland of V Instar in sunlight Plate 2. Posterior silk gland of V Instar in**

**sunlight**


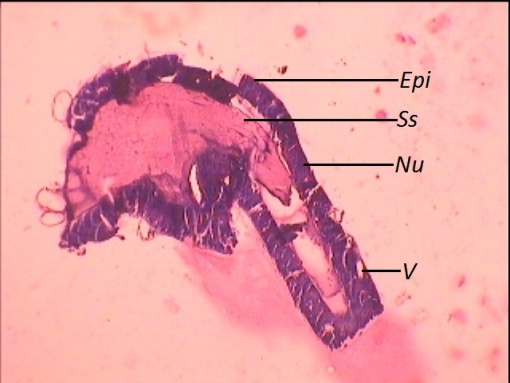
 **
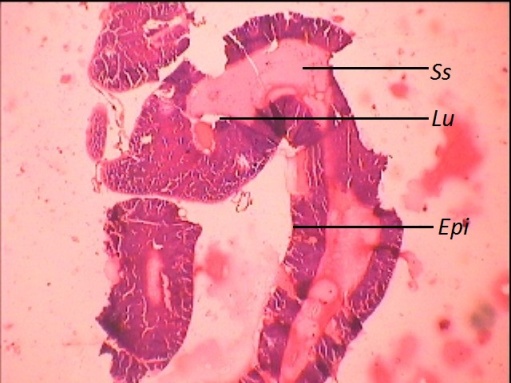
**

**Plate 3. Middle silk gland of V Instar in Plate 4. Posterior silk gland of V Instar in**

**Artificial light Artificial light**

**
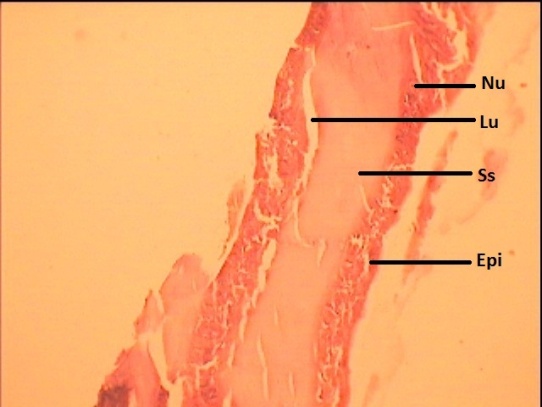

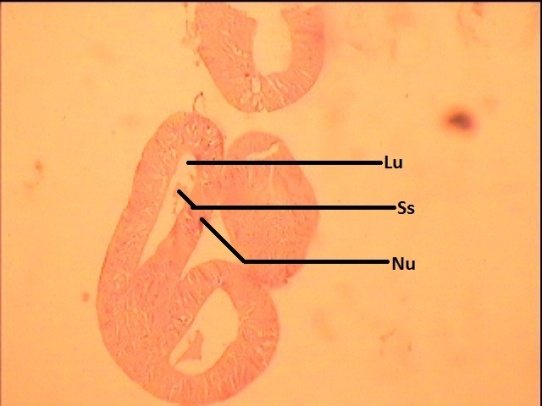
**

**Plate 5. Middle silk gland of V Instar in dark Plate 6. Posterior silk gland of V Instar in dark dark**
